# Supplementary material for: The Lipid and Glyceride Profiles of Infant Formula Differ by Manufacturer, Region and Date Sold
Source: MDPI journal article supplement (doi:10.3390/nu11051122), 2019-05-20
Supplement: s1 [file s1]

Fig. S2

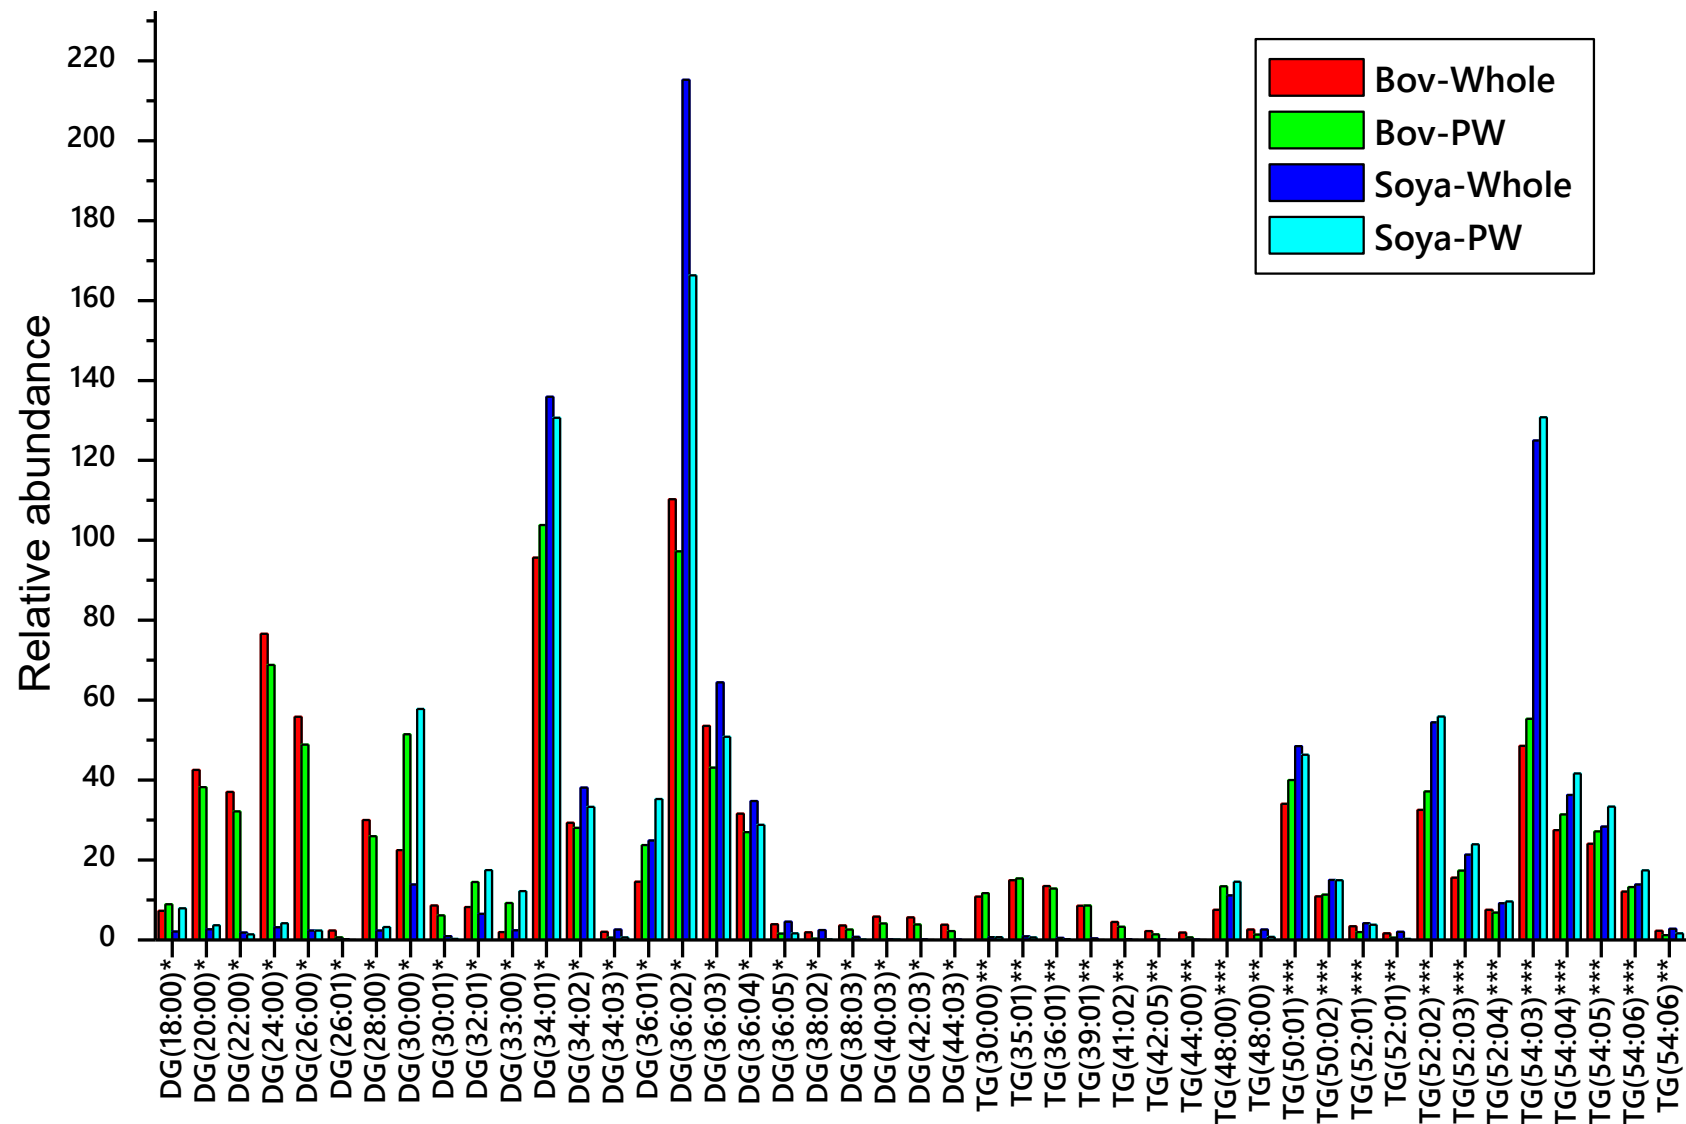

Fig. S2. The glyceride profile of cows' milk (Bov-) and soya milk, collected in the positive mode of Direct Infusion MS. Whole, unwashed; PW, washed with hexane.
