# Supplementary material for: The Lipid and Glyceride Profiles of Infant Formula Differ by Manufacturer, Region and Date Sold
Source: MDPI journal article supplement (doi:10.3390/nu11051122), 2019-05-20
Supplement: s1 [file s1]

Fig. S1

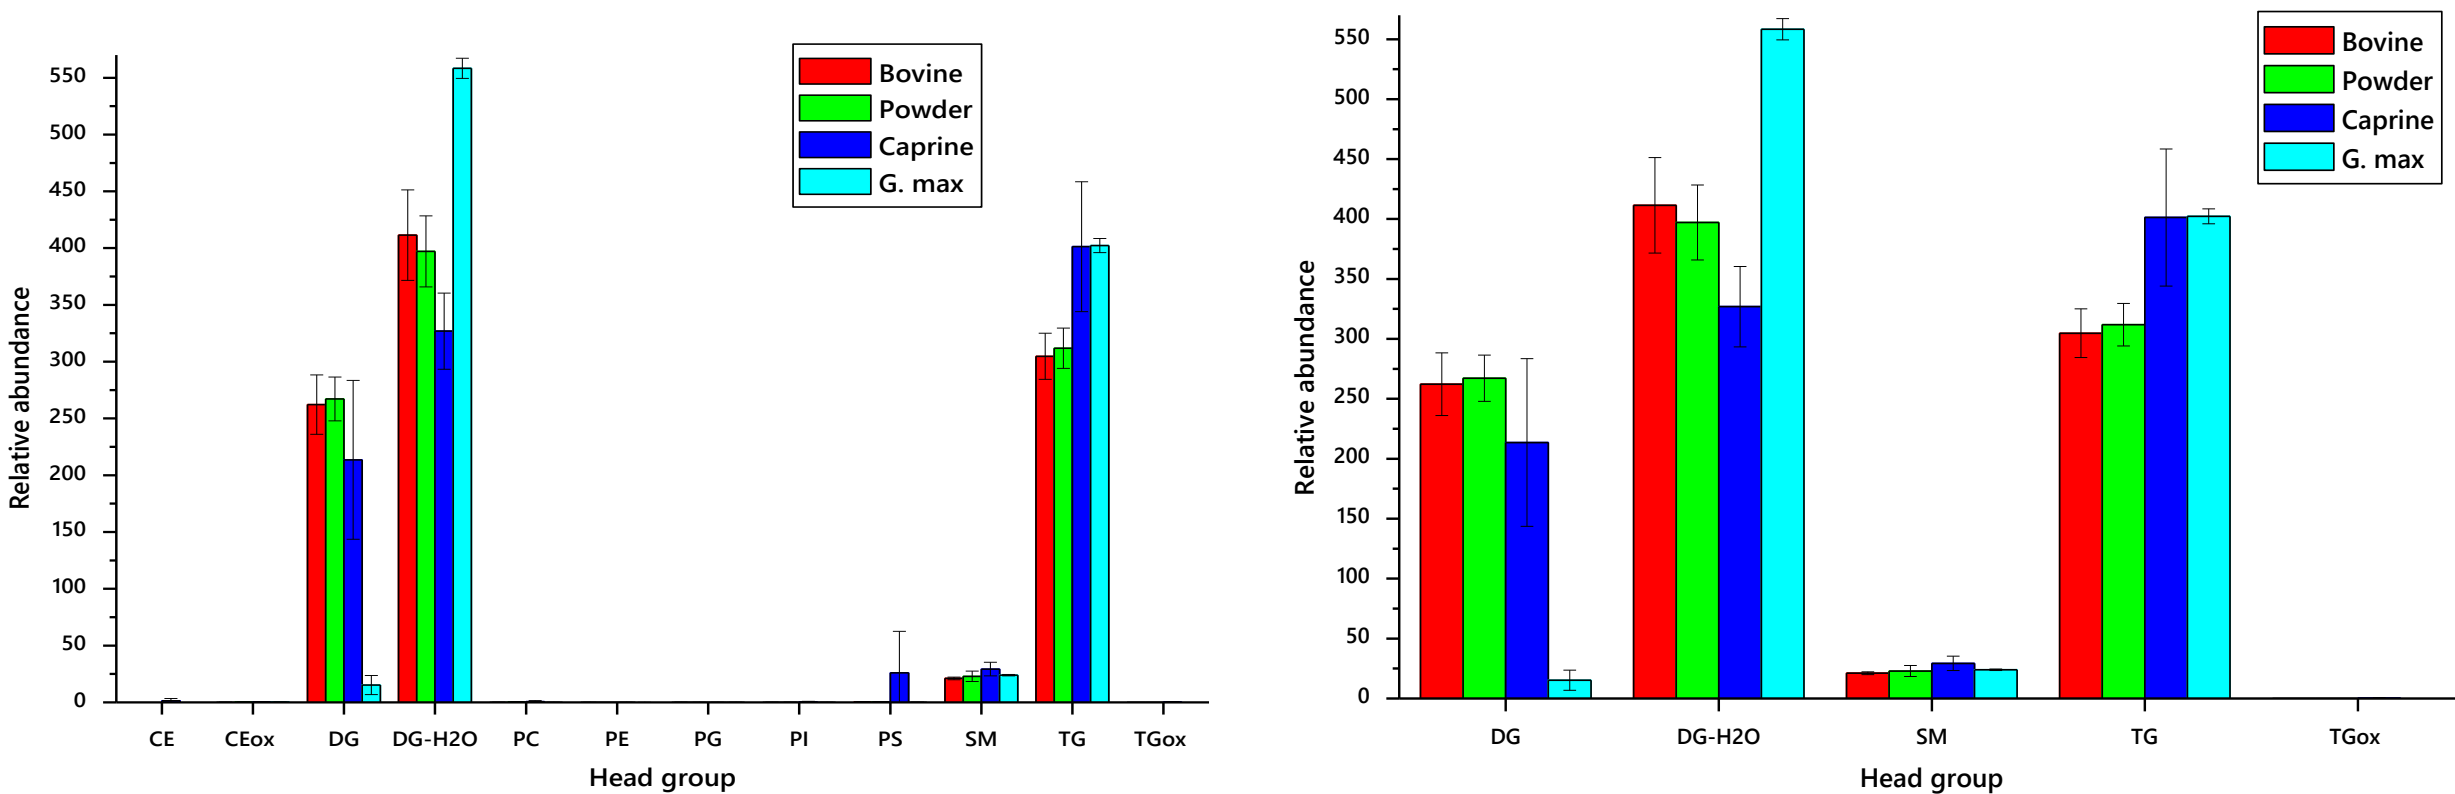

Fig. S1. Profile of the head groups of fresh milk collected in positive mode of Direct Infusion-MS. Panel A, all head groups; B, most abundant types.
