# Supplementary material for: The Lipid and Glyceride Profiles of Infant Formula Differ by Manufacturer, Region and Date Sold
Source: MDPI journal article supplement (doi:10.3390/nu11051122), 2019-05-20
Supplement: s1 [file s1]

Fig. S4

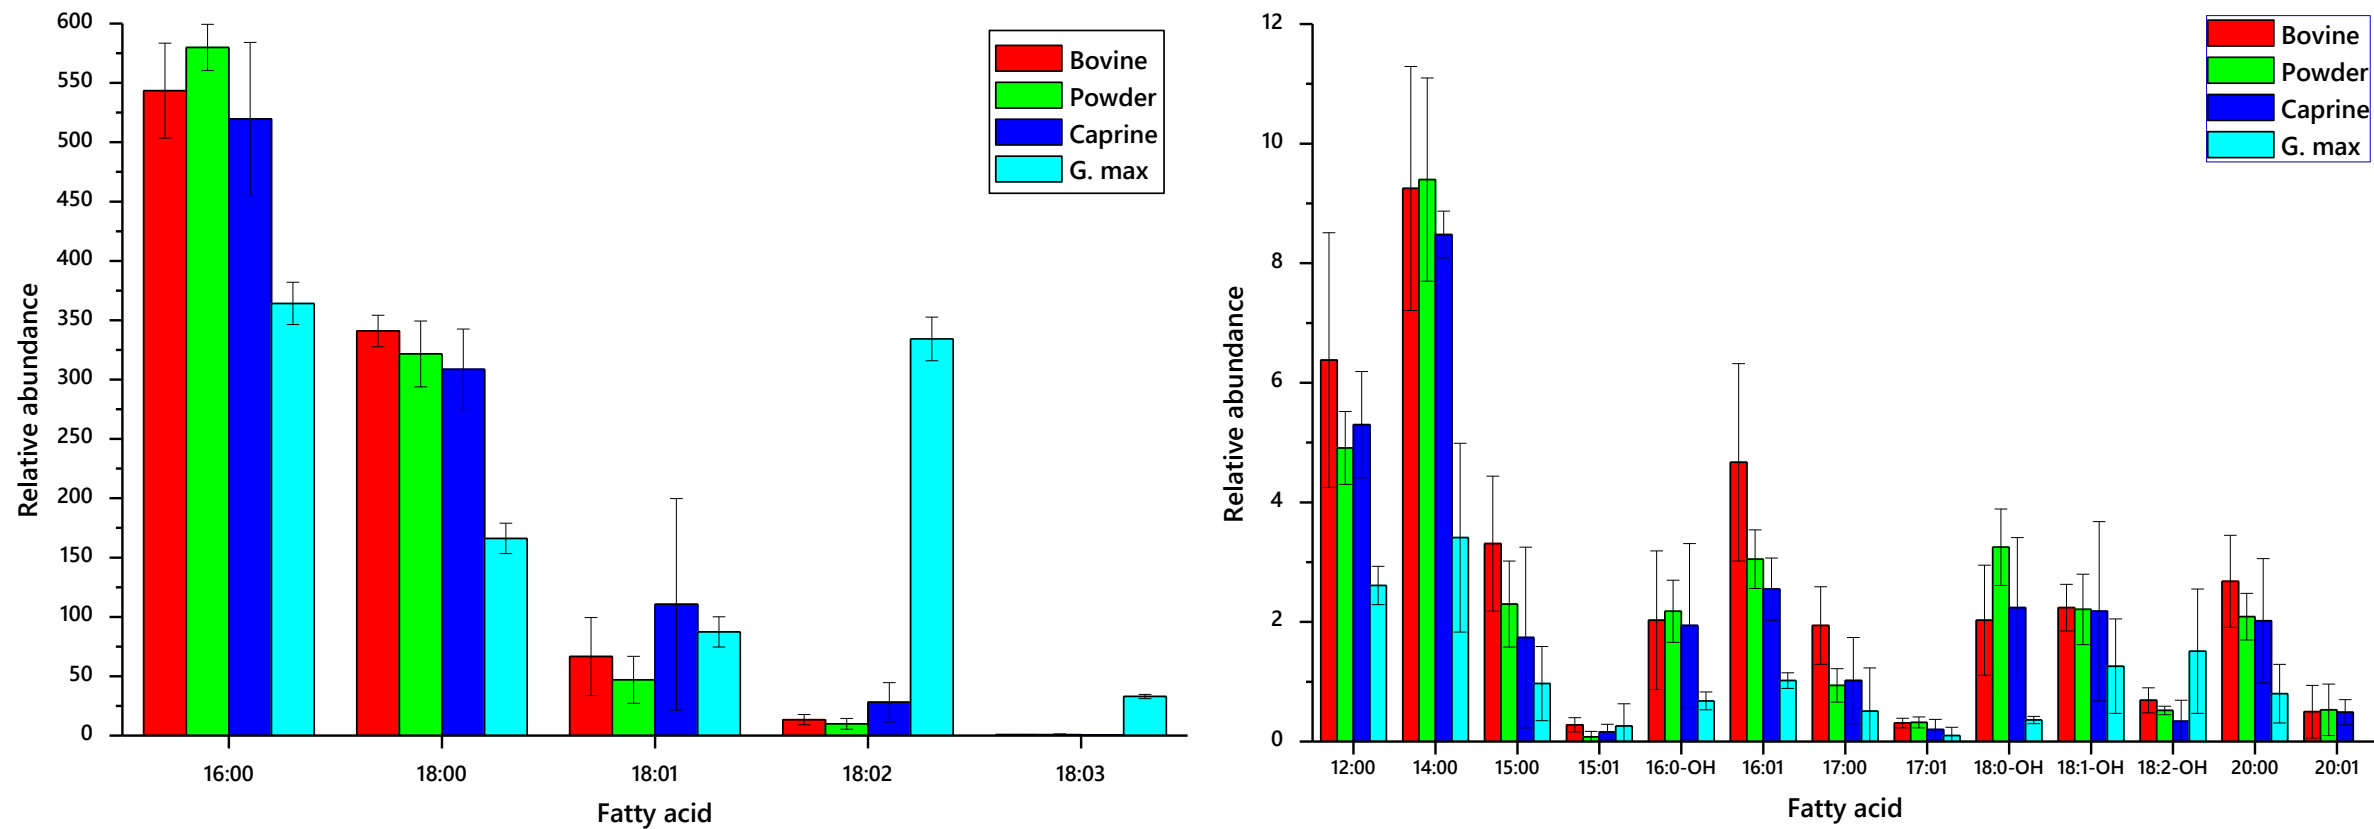

Fig. S4. Profile of fatty acids collected in negative mode of Direct Infusion-MS with collision-induced dissociation of samples washed with hexane. Left, more abundant species; Right, less abundant species.
