# Supplementary material for: The Lipid and Glyceride Profiles of Infant Formula Differ by Manufacturer, Region and Date Sold
Source: MDPI journal article supplement (doi:10.3390/nu11051122), 2019-05-20
Supplement: s1 [file s1]

Fig S5

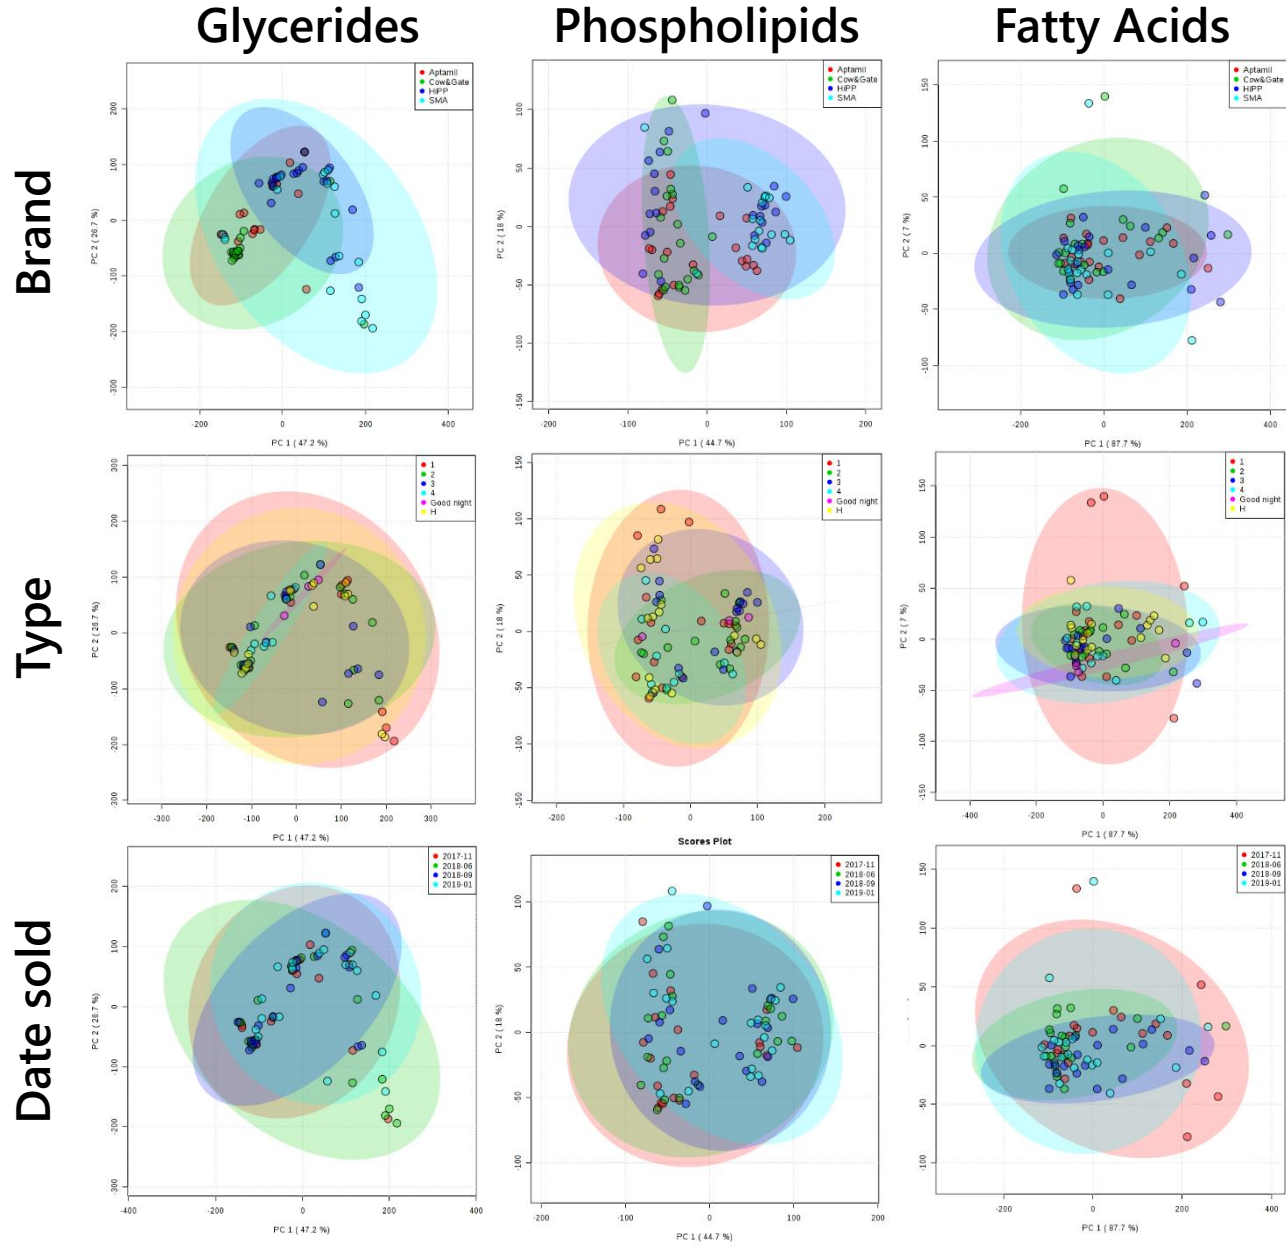

Fig. S5. PCAs of the British formula (UKB1-4) representing glyceride (left column), lipid (middle column) and fatty acid (right column) profiles. Samples are grouped according to Brand (top row), Target demographic (middle row), and Date soled (bottom row).
